# Supplementary material for: Solid Matrix-Supported Supercritical CO2 Enhances Extraction of γ-Linolenic Acid from the Cyanobacterium Arthrospira (Spirulina) platensis and Bioactivity Evaluation of the Molecule in Zebrafish
Source: PubMed Central journal article supplement (PMC6520994; doi:10.3390/md17040203), 2019-03-30
Supplement: marinedrugs-17-00203-s001.pdf [file marinedrugs-17-00203-s001.pdf]

Article

# Solid Matrix-Supported Supercritical CO<sub>2</sub> Enhances Extraction of $\gamma$ -Linolenic Acid from the Cyanobacterium *Arthrospira (Spirulina) platensis* and Bioactivity Evaluation of the Molecule in Zebrafish

Xiaohong Yang <sup>1,5</sup>, Yi Li <sup>2,6</sup>, Yanhua Li <sup>1</sup>, Ding Ye <sup>2,6</sup>, Li Yuan <sup>1</sup>, Yonghua Sun <sup>2,6</sup>, Danxiang Han <sup>1,4,\*</sup> and Qiang Hu <sup>1,2,3,4,7,\*</sup>

<sup>1</sup> Center for Microalgal Biotechnology and Biofuels, Institute of Hydrobiology, Chinese Academy of Sciences, Wuhan 430072, China; xhyang@ihb.ac.cn (X.Y.); yanhuali@ihb.ac.cn (Y.L.); liyuan@ihb.ac.cn (L.Y.)

<sup>2</sup> State Key Laboratory of Freshwater Ecology and Biotechnology, Institute of Hydrobiology, Chinese Academy of Sciences, Wuhan 430072, China; liyi\_0831@126.com (Y.L.); yeding@ihb.ac.cn (D.Y.); yhsun@ihb.ac.cn (Y.S.)

<sup>3</sup> Laboratory for Marine Biology and Biotechnology, Qingdao National Laboratory for Marine Science and Technology, Qingdao 266237, China

<sup>4</sup> Key Laboratory for Algal Biology, Institute of Hydrobiology, Chinese Academy of Sciences, Wuhan 430072, China

<sup>5</sup> College of Life Sciences, University of Chinese Academy of Sciences, Beijing 100049, China

<sup>6</sup> College of Advanced Agricultural Sciences, University of Chinese Academy of Sciences, The Innovative Academy of Seed Design, Chinese Academy of Sciences, Beijing 100049, China

<sup>7</sup> Beijing Key Laboratory of Algae Biomass, Microalgae Biotechnology Center, SDIC Biotech Investment Co., LTD., State Development & Investment Corp., Beijing 100142, China

\* Correspondence: huqiang@ihb.ac.cn (Q.H.); danxianghan@ihb.ac.cn (D.H.)

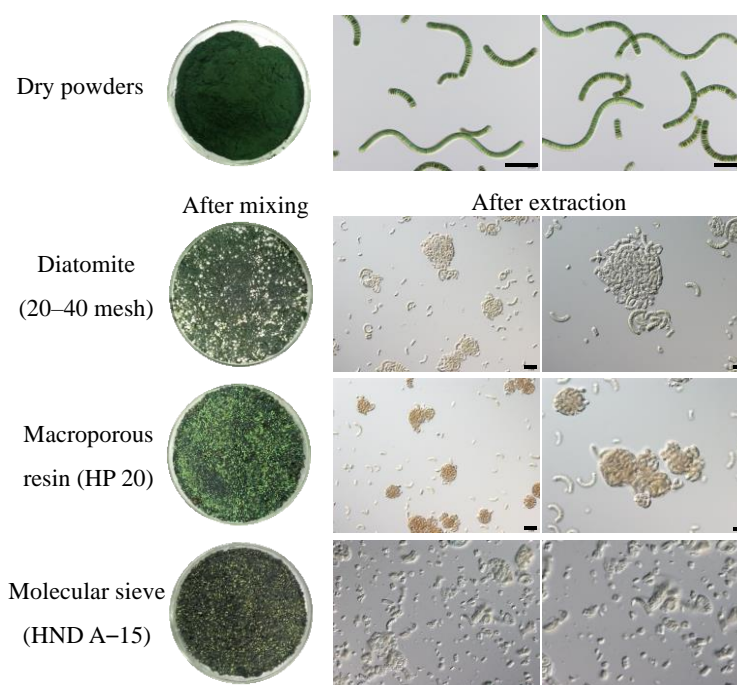

**Figure S1.** Comparison of the states of mixing porous materials with algal powders and the microscopic images of residues (Scale bar 50  $\mu$ m).

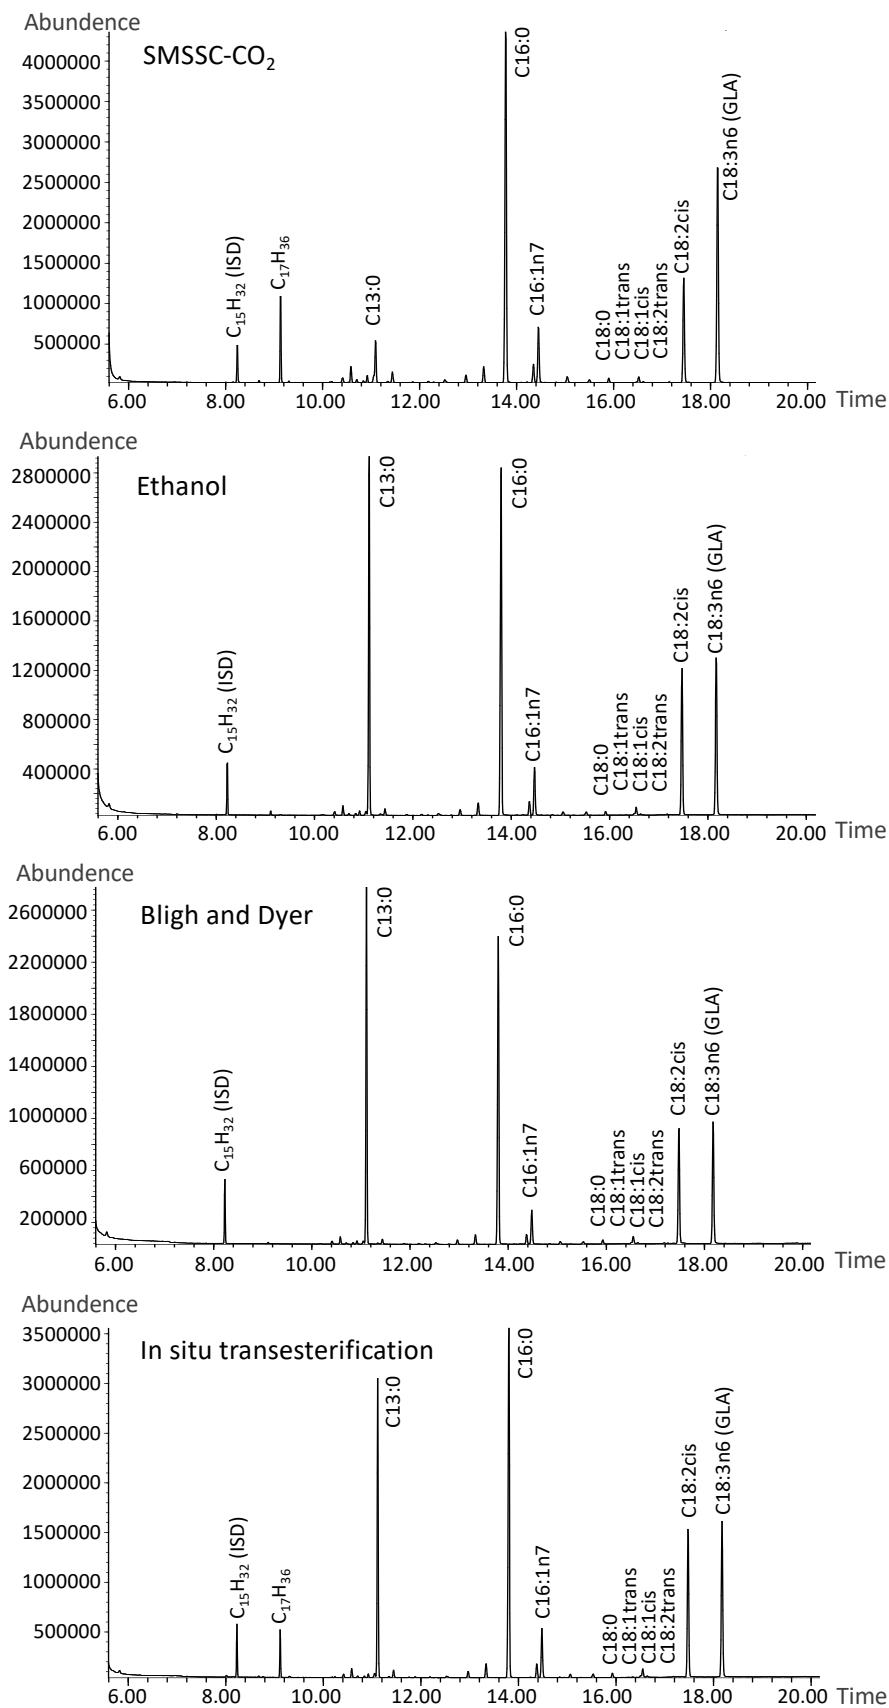

**Figure S2.** The chromatograms of fatty acid profiles obtained from the solid matrix-supported supercritical CO<sub>2</sub> (SMSSC-CO<sub>2</sub>), ethanol, Bligh and Dyer, and in situ transesterification methods.
